# Supplementary material
Source: Springer Nature journal article supplement (https://www.springermedizin.de/resource/supplementary/12936_2008_620_MOESM4_ESM.pdf/9547840)
Supplement: MOESM4 [file 9547840]

**Predictors of household ownership of ITN**

| COMBINED Model I*      |      |             |         | URBAN Model II§ |      |              |                 |      |            |         | RURAL Model III†       |      |            |         |                 |           |         |
|------------------------|------|-------------|---------|-----------------|------|--------------|-----------------|------|------------|---------|------------------------|------|------------|---------|-----------------|-----------|---------|
| (n=4186) #             |      |             |         | South (n=589)#  |      |              | North (n=1047)# |      |            |         | South (n=1587)#        |      |            |         | North (n=1119)# |           |         |
| *Predictors            | **OR | 95% CI**    | P-value | *Predictors     | ^OR  | 95% CI       | P-value         | €OR  | 95% CI     | P-value | *Predictors            | *OR  | 95% CI     | P-value | §OR             | 95% CI    | P-value |
| U5 child in HH**       |      |             |         | U5 child in HH  |      |              |                 |      |            |         | U5 child in HH         |      |            |         |                 |           |         |
| No                     | 1    |             |         | No              | 1    |              |                 | -    |            |         | No                     | 1    |            |         |                 |           |         |
| Yes                    | 1.55 | 1.53 - 1.94 | <0.0001 | Yes             | 3.42 | 1.87 - 6.27  | <0.0001         | -    | -          | -       | yes                    | 1.47 | 1.001-2.15 | 0.05    |                 |           |         |
| Health facility status |      |             |         | HH Religion     |      |              |                 |      |            |         | HH Religion            |      |            |         |                 |           |         |
| No                     | 1    | 1.59 - 2.53 | <0.0001 | Islam           | 1    |              | 0.026           | -    |            |         | Islam                  | 1    |            |         | 1               |           |         |
| Yes                    | 1.97 | 1.55 - 2.50 |         | Christianity    | 6.78 | 1.61 - 28.63 | 0.009           | -    | -          | -       | Christianity           | 5.95 | 1.45-24.4  | 0.013   | 0.43            | 0.29-0.64 | <0.0001 |
| Region*Residence       |      |             |         | Other           | 3.27 | 0.28- 41.20  | 0.353           | -    | -          | -       | Other                  | 0.00 | 0.00       | 0.998   | 0.00            | 0.00      | 0.998   |
| South*Urban            | 1    |             |         | Health facility |      |              |                 |      |            |         | RWI                    | 1.37 | 1.18-1.60  | <0.0001 |                 |           |         |
| North*Rural            | 1.97 | 1.55-2.50   | <0.0001 | No              | -    |              |                 | 1    |            |         | Health facility status |      |            |         |                 |           |         |
| CWI*Education          |      |             |         | Yes             | -    | -            | -               | 5.8  | 2.05-16.41 | 0.001   | No                     | 1    |            |         |                 |           |         |
| CWI*No                 | 1    |             |         | Education^^     |      |              |                 |      |            |         | Yes                    | 3.16 | 2.10-0.76  | <0.0001 | -               | -         | -       |
| CWI*Yes                | 1.15 | 1.02 - 1.29 | 0.025   | No              | -    |              |                 | 1    |            |         | RWI*HH                 |      |            |         |                 |           |         |
| HH head gender         |      |             |         | Yes             | -    | -            | -               | 1.93 | 1.10-0.38  | 0.022   | head gender            |      |            |         |                 |           |         |
| Female                 | 1    |             |         | UWI* Education  |      |              |                 |      |            |         | WI*Female              | 1    |            |         |                 |           |         |
| Male                   | 1.87 | 1.09 - 3.20 | 0.023   | UWI*No          |      |              |                 | 1    |            |         | WI*Male                | 0.7  | 0.55-0.89  | 0.001   |                 |           |         |
| Family size            | 1.88 | 1.13 - 3.13 | 0.015   | UWI*Yes         |      |              |                 | 1.33 | 1.02-1.75  | 0.039   |                        |      |            |         |                 |           |         |
| Education              |      |             |         |                 |      |              |                 |      |            |         |                        |      |            |         |                 |           |         |
| No                     | 1    |             |         |                 |      |              |                 |      |            |         |                        |      |            |         |                 |           |         |
| Yes                    | 1.36 | 1.07 - 1.73 | 0.012   |                 |      |              |                 |      |            |         |                        |      |            |         |                 |           |         |

\*Variables in the final model. #Data included in the analysis, all missing data were excluded from the analysis P-values significant at 0.05 CI, confidence interval H&L, Hosmer and Lemeshow goodness-of-fit test. \*\*HH, households; RWI, rural wealth index; RWI\*HH head's Gender, interaction term for wealth index and household head's gender; Region\*Residence, interaction term for dichotomised region and residence (urban/rural); CWI\*Education, interaction term for combined wealth index and education; UWI\* Education, interaction term for urban wealth index and education. Education^^, presence of an educated eligible female respondent in the household

\* Logistic regression run for combined data (H&L test P-value =0.11) \*\*OR, Odds ratio; adjusted for religion, residence, family size (log value was used in analysis), combined household wealth index, and combined household wealth index by household head's gender.

§ Model developed for urban household, data split by region (H&L test P-value: South, 0.17; North, 0.11) ^OR, odds ratio adjusted for family size, education (dichotomised), education by urban wealth index, urban wealth index, urban wealth index by household head's gender, and household head's gender. €OR, odds ratio adjusted for family size, U5 child in the household, religion, health facility status, urban wealth index, urban wealth index by household head's gender, and household head's gender

† Model developed for rural households, data split by region (H&L test P-value: South, 0.78; North, 0.16) †OR, odds ratio adjusted for household head's gender, rural wealth index by household head's gender, health facility status, education (dichotomised), education by rural wealth index, and religion. §OR, odds ratio adjusted for rural wealth index, U5 child in the household, education (dichotomised), education by rural wealth index, and household head's gender.
